# Supplementary material for: Formaldehyde impairs transepithelial sodium transport
Source: PubMed Central journal article supplement (PMC5071906; doi:10.1038/srep35857), 2016-10-20

# Formaldehyde impairs transepithelial sodium transport

Yong Cui<sup>1,#</sup>, Huiming Li<sup>2,#</sup>, Sihui Wu<sup>2</sup>, Runzhen Zhao<sup>3</sup>, Deyi Du<sup>2</sup>, Yan Ding<sup>2</sup>,  
Hongguang Nie<sup>2,\*</sup>, Hong-Long Ji<sup>3,\*</sup>

<sup>1</sup>Department of Anesthesiology, First Affiliated Hospital of China Medical University, Shenyang, Liaoning, China; <sup>2</sup>Institute of Metabolic Disease Research and Drug Development, China Medical University, Shenyang, Liaoning, China; <sup>3</sup>Department of Cellular and Molecular Biology, University of Texas Health Science Center at Tyler, Tyler, Texas, USA

Running title: Formaldehyde inhibits ENaC

#These authors contributed equally to this work.

\*Corresponding Authors:

Dr. Hongguang Nie, PhD, MD. [hgnie@cmu.edu.cn](mailto:hgnie@cmu.edu.cn) and Dr. Hong-Long Ji, MD, PhD.

[james.ji@uthct.edu](mailto:james.ji@uthct.edu).

Supplementary Figure 1. The full-length blots/gels of  $\alpha$ -ENaC protein extracted from H441 cells exposed to 200  $\mu$ M formaldehyde for 0-48 h. Blots were immunostained with antibody to  $\alpha$ -ENaC, or to  $\beta$ -actin as a loading control.

Supplementary Figure 2. The full-length blots/gels of phosphorylated ERK1/2 in protein extracted from H441 cells exposed to 200  $\mu$ M formaldehyde for 0-90 min.

Blots were immunostained with total ERK1/2 as a loading control.

Supplementary Figure 1

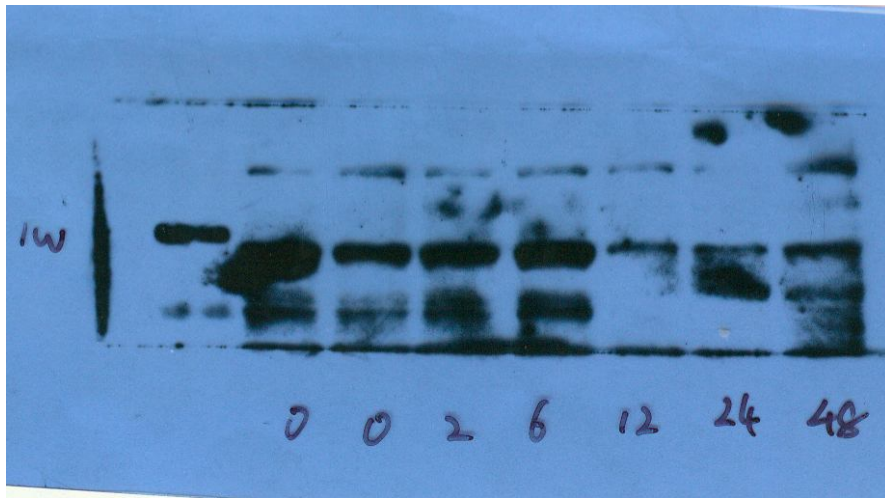

Supplementary Figure 2

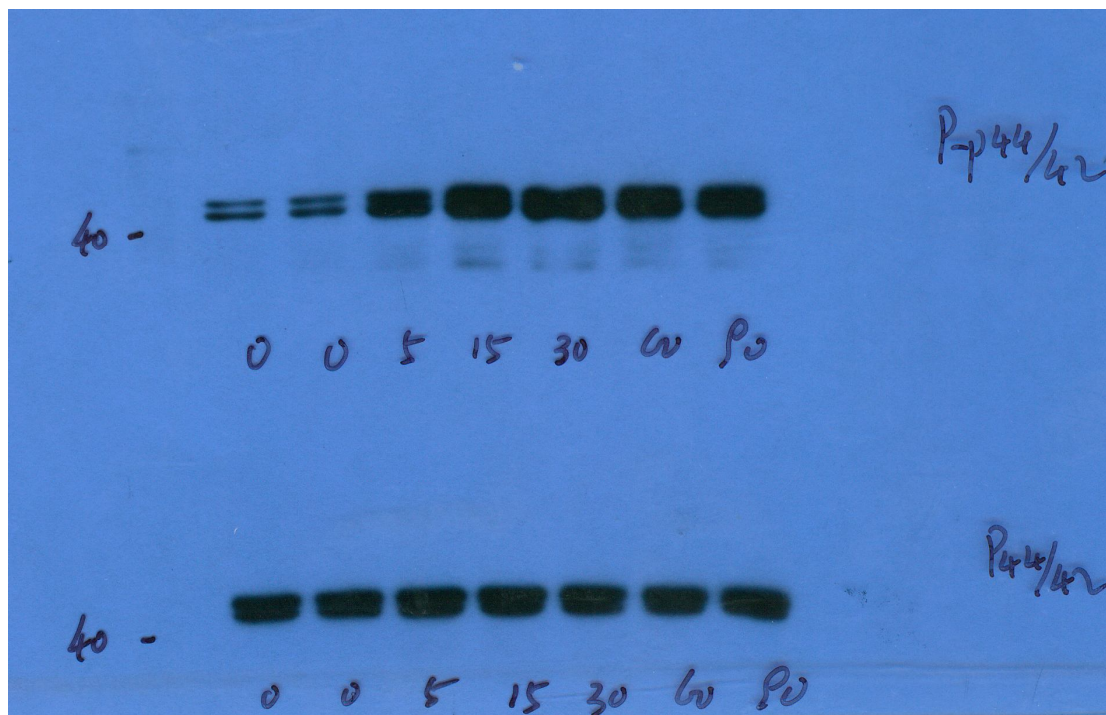

Supplement: srep35857-s1.pdf [file srep35857-s1.pdf]
